# Supplementary material for: Oligosaccharides and Complex Carbohydrates: A New Paradigm for Cranberry Bioactivity
Source: Molecules. 2020 Feb 17;25(4):881. doi: 10.3390/molecules25040881 (PMC7070526; doi:10.3390/molecules25040881)
Supplement: Supplementary file 1 [file molecules-25-00881-s001.xlsx]

## Sheet: Oligo Fractions
Material Name/ Fraction Name	original reference	First Reported Year	source material/ source fraction	Sorbent; Solvent used to obtain the fraction	Detection Method	Elution Profile	Sorbent Type	Yield (% prev fract)	Min Yield (% of initial starting material (w/w) or g/L CJS)	Assays	Spectroscopic Analyses Reported	chemical analyses reported:	Content Notes (monosacc, other comp)
CJ (CHEP)	Coleman 2014, Coleman 2019	2010	NA	obtained from Ocean Spray Cranberries. Labeled "Cranberry Hull Extract Powder" sample date 2004-08-05	NA	NA	NA	NA	NA	E. coli anti-agglutination, radiolabeled E. coli anti-adhesion, fluorescence-labeled E. coli anti-adhesion, antimicrobial activity against 12 pathogens (inactive)	H NMR, HPLC-PDAD-ELSD, LC-ESI-MS	MW cut-off dialysis with 3, 10, and 30 kDa membranes in water, pH Stability assessment
CJE1	Coleman 2014	2010	CHEP	solvent/solvent extraction of 100 g in 450 mL water (10x x 1:3 v/v ethyl acetate: water)	NA: solvent partitioning	EtOAc soluble	NA	0.0102	0.0102	E. coli anti-agglutination, radiolabeled E. coli anti-adhesion, antimicrobial activity against 12 pathogens (inactive)	H NMR, HPLC-PDAD-ELSD, LC-ESI-MS	anthocyanin test (isopropanol/HCl)	further chemical separation was performed on this material but the compounds isoalted were primarily flavonoids that had been previously reported and these findings were not published
CJA1	Coleman 2014, Coleman 2019	2010	CHEP	solvent/solvent extraction of 100 g in 450 mL water (10x x 1:3 v/v ethyl acetate: water)	NA: solvent partitioning	water soluble	NA	0.9898	0.9898	E. coli anti-agglutination, radiolabeled E. coli anti-adhesion, antimicrobial activity against 12 pathogens (inactive)	H NMR, HPLC-PDAD-ELSD, LC-ESI-MS	anthocyanin test (isopropanol/HCl)
CJA1-02	Coleman 2014, Coleman 2019	2010	CJA	Sephadex LH-20 with 70% EtOH (7x37 cm); 25.6 g CJA in 100 mL 70% EtOH	NA: vol/time-based collection; visual appearance-based fraction combinations	early elution from SepLH20	SepLH20	0.1414	0.14	E. coli HRBC anti-agglutination	H NMR, HPLC-PDAD-ELSD, LC-ESI-MS
CJA1-02B	Coleman 2014, Coleman 2019	2010	CJA	Sephadex LH-20 with 70% EtOH (7x37 cm); 25.6 g CJA in 100 mL 70% EtOH	NA: vol/time-based collection; visual appearance-based fraction combinations	early elution from SepLH20	SepLH20	0.05	0.0495	E. coli HRBC anti-agglutination	H NMR, HPLC-PDAD-ELSD, LC-ESI-MS
CJA1-03B	Coleman 2014, Coleman 2019	2010	CJA	Sephadex LH-20 with 70% EtOH (7x37 cm); 25.6 g CJA in 100 mL 70% EtOH	NA: vol/time-based collection; visual appearance-based fraction combinations	early elution from SepLH20	SepLH20	0.0652	0.0645	E. coli HRBC anti-agglutination	H NMR, HPLC-PDAD-ELSD, LC-ESI-MS
CJ-P1t22	Coleman 2014, Coleman 2019	2014	CHEP	HPLC with Atlantis dC18 sorbent, 100% water to 100% methanol gradient. 350 mg with two separations. 60% Sample loss from filtering and split-ELSD collection	PDAD-ELSD	10-18% MeOH	C18	0.00942857	0.00942857	NA	HPLC-PDAD-ELSD, H NMR (in DMSO-d6)
CJ-P1t23	Coleman 2014, Coleman 2019	2014	CHEP	HPLC with Atlantis dC18 sorbent, 100% water to 100% methanol gradient. 350 mg with two separations. 60% Sample loss from filtering and split-ELSD collection	PDAD-ELSD	10-18% MeOH	C18	0.0114286	0.0114286	NA	HPLC-PDAD-ELSD, H NMR (in DMSO-d6)
CJ-P1t25	Coleman 2014, Coleman 2019	2014	CHEP	HPLC with Atlantis dC18 sorbent, 100% water to 100% methanol gradient. 350 mg with two separations. 60% Sample loss from filtering and split-ELSD collection	PDAD-ELSD	10-18% MeOH	C18	0.0208571	0.0208571	NA	HPLC-PDAD-ELSD, H NMR (in DMSO-d6)
CJ-P1t28	Coleman 2014, Coleman 2019	2014	CHEP	HPLC with Atlantis dC18 sorbent, 100% water to 100% methanol gradient. 350 mg with two separations. 60% Sample loss from filtering and split-ELSD collection	PDAD-ELSD	10-18% MeOH	C18	0.0217143	0.0217143	NA	HPLC-PDAD-ELSD, H NMR (in DMSO-d6)
CJ-P1t35	Coleman 2014	2014	CHEP	HPLC with Atlantis dC18 sorbent, 100% water to 100% methanol gradient. 350 mg with two separations. 60% Sample loss from filtering and split-ELSD collection	PDAD-ELSD	18-40% MeOH	C18	0.0365714	0.0365714	NA	HPLC-PDAD-ELSD
CJ-P1t38	Coleman 2014, Coleman 2019	2014	CHEP	HPLC with Atlantis dC18 sorbent, 100% water to 100% methanol gradient. 350 mg with two separations. 60% Sample loss from filtering and split-ELSD collection	PDAD-ELSD	50% MeOH	C18	0.0185714	0.0185714	NA	HPLC-PDAD-ELSD, H NMR (in DMSO-d6)
CJE2	Auker 2013, Coleman 2014, Auker 2019	before 2013 as presentations	CHEP	solvent/solvent extraction of the water soluble portion of 40 g in 300 mL water (4x 150 mL ethyl acetate)	NA: solvent partitioning	EtOAc soluble	NA	0.01025	0.01025	NA	NA
CJA2	Auker 2013, Coleman 2014, Auker 2019	before 2013 as presentations	CHEP	solvent/solvent extraction of the water soluble portion of 40 g in 300 mL water (4x 150 mL ethyl acetate)	NA: solvent partitioning	water soluble (solids removed)	NA	0.96	0.96	NA	NA
CJA2-02	Auker 2013, Coleman 2014, Auker 2019	before 2013 as presentations	CJA	Sephadex LH-20 with 70% EtOH (7x37 cm); 25.3 mg CJA in 100 mL 70% EtOH	NA: vol/time-based collection; visual appearance-based fraction combinations	early elution from SepLH20	SepLH20	0.0826087	0.0797	E. coli HRBC anti-agglutination	HPLC-PDAD-ELSD, H NMR
CJA2-03	Auker 2013, Coleman 2014, Auker 2019	before 2013 as presentations	CJA	Sephadex LH-20 with 70% EtOH (7x37 cm); 25.3 g CJA in 100 mL 70% EtOH	NA: vol/time-based collection; visual appearance-based fraction combinations	early elution from SepLH20	SepLH20	0.157312	0.151	E. coli HRBC anti-agglutination	HPLC-PDAD-ELSD, H NMR
CJA2-04	Auker 2013, Coleman 2014, Auker 2019	before 2013 as presentations	CJA	Sephadex LH-20 with 70% EtOH (7x37 cm); 25.3 g CJA in 100 mL 70% EtOH	NA: vol/time-based collection; visual appearance-based fraction combinations	early elution from SepLH20	SepLH20	0.0687747	0.066	E. coli HRBC anti-agglutination	HPLC-PDAD-ELSD, H NMR
CJA2-05	Auker 2013, Coleman 2014, Auker 2019	before 2013 as presentations	CJA	Sephadex LH-20 with 70% EtOH (7x37 cm); 25.3 g CJA in 100 mL 70% EtOH	NA: vol/time-based collection; visual appearance-based fraction combinations	early elution from SepLH20	SepLH20	0.0715415	0.069	E. coli HRBC anti-agglutination	HPLC-PDAD-ELSD, H NMR
CJA2-03Fr4	Auker 2013, Auker 2019	before 2013 as presentations	CJA2-03	HPLC with Waters Atlantis dC18 sorbent, 100% water to 30% methanol gradient. 1 g in 4 mL water. Sample loss from split-ELSD collection	PDAD-ELSD	23-25% MeOH	C18	0.056	0.0085				majority of sample lost after analytical Polyamine II analysis. Sufficient information allowed identity to be confirmed as the same as SNA-03Fr4
CJA2-03Fr5	Auker 2013, Auker 2019	before 2013 as presentations	CJA2-03	HPLC with Waters Atlantis dC18 sorbent, 100% water to 30% methanol gradient. 1 g in 4 mL water. Sample loss from split-ELSD collection	PDAD-ELSD	23-25% MeOH	C18	0.097	0.0146				same as SNA-03Fr5
Octasaccharide GSGS	Auker 2013, Auker 2019	before 2013 as presentations	CJA2-03Fr5	HPLC with YMC Polyamine II sorbent, Isocratic 63% acetonitrile. 60 mg sample, multiple separations. Sample loss from split-ELSD collection	PDAD-ELSD	28 min, 63% acetonitrile	polyamine	0.333	0.0049	viability of breast cancer cell lines (T47D and MDA-MB-231), antimicrobial activity against 12 pathogens (inactive)		NMR (1D, 2D), glycosyl composition, glycosyl linkage, glycosyl configuration, mass by UHPLC-QTOFMS with per-O-methylation
SN	Auker 2013, Auker 2019	before 2013 as presentations		commercialy available cranberry powder in capsules (Sundown Naturals "cranberry fruit powder")	NA	NA	NA	NA	NA	NA	HPLC-PDAD-ELSD, H NMR
SNE	Auker 2013, Auker 2019	before 2013 as presentations	SN	solvent/solvent extraction of the water soluble portion of 40 g in 300 mL water (4x 150 mL ethyl acetate)	NA: solvent partitioning	EtOAc soluble	NA	0.00775	0.00775	NA	HPLC-PDAD-ELSD, H NMR
SNA-all	Auker 2013, Auker 2019	before 2013 as presentations	SN	solvent/solvent extraction of the water soluble portion of 40 g in 300 mL water (4x 150 mL ethyl acetate)	NA: solvent partitioning	water soluble	NA	not given	not given	NA	NA		a portion of solids precipated using 67% ethanol. These compounds were likely to be pectins based on solubility profiles but further analyses were not pursued
SNA	Auker 2013, Auker 2019	before 2013 as presentations	SNA-all	precipitation of pectins by addition of EtOH to aqueous soluble fraction (67% EtOH solution)	NA: solvent partitioning	soluble in 67% EtOH	NA	0.351	0.351	radiolabeled E. coli anti-adhesion	HPLC-PDAD-ELSD, H NMR
SNA-02	Auker 2013, Auker 2019	before 2013 as presentations	SNA	Sephadex LH-20 with 70% EtOH (7x37 cm); 13.7 g SNA in 60 mL 70% EtOH	NA: vol/time-based collection; visual appearance-based fraction combinations	early elution from SepLH20	SepLH20	0.0832117	0.029	NA	HPLC-PDAD-ELSD, H NMR
SNA-03	Auker 2013, Auker 2019	before 2013 as presentations	SNA	Sephadex LH-20 with 70% EtOH (7x37 cm); 13.7 g SNA in 60 mL 70% EtOH	NA: vol/time-based collection; visual appearance-based fraction combinations	early elution from SepLH20	SepLH20	0.264234	0.093	antimicrobial activity against 12 pathogens (inactive), viability of breast cancer cell lines (T47D and MDA-MB-231) (inactive)	HPLC-PDAD-ELSD, H NMR
SNA-04	Auker 2013, Auker 2019	before 2013 as presentations	SNA	Sephadex LH-20 with 70% EtOH (7x37 cm); 13.7 g SNA in 60 mL 70% EtOH	NA: vol/time-based collection; visual appearance-based fraction combinations	early elution from SepLH20	SepLH20	0.178102	0.062	NA	HPLC-PDAD-ELSD, H NMR
SNA-03Fr4	Auker 2013, Auker 2019	before 2013 as presentations	SNA-03	HPLC with Waters Atlantis dC18 sorbent, 100% water to 30% methanol gradient. 3.17 g in 9 mL water. Sample loss from split-ELSD collection	PDAD-ELSD	23-25% MeOH	C18	0.047	0.0044	NA	HPLC-PDAD-ELSD, H NMR
SNA-03Fr5	Auker 2013, Auker 2019	before 2013 as presentations	SNA-03	HPLC with Waters Atlantis dC18 sorbent, 100% water to 30% methanol gradient. 3.17 g in 9 mL water. Sample loss from split-ELSD collection	PDAD-ELSD	23-25% MeOH	C18	0.079	0.0073	NA	HPLC-PDAD-ELSD, H NMR
Heptasaccharide GXGS	Auker 2013, Auker 2019	before 2013 as presentations	SNA-03Fr4	HPLC with YMC Polyamine II sorbent, Isocratic 63% acetonitrile. 80.1 mg sample, multiple separations. Sample loss from split-ELSD collection	PDAD-ELSD	25 min, 63% acetonitrile	polyamine	0.387	0.0017	viability of breast cancer cell lines (T47D and MDA-MB-231) (inactive)	HPLC-PDAD-ELSD, 1D, 2D NMR	NMR (1D, 2D), glycosyl composition, glycosyl linkage, glycosyl configuration, mass by UHPLC-QTOFMS with per-O-methylation
Octasaccharide GSGS	Auker 2013, Auker 2019	before 2013 as presentations	SNA-03Fr5	HPLC with YMC Polyamine II sorbent, Isocratic 63% acetonitrile. 169.4 mg sample, multiple separations. Sample loss from split-ELSD collection	PDAD-ELSD	28 min, 63% acetonitrile	polyamine	0.384	0.0028	viability of breast cancer cell lines (T47D and MDA-MB-231) (inactive), antimicrobial activity against 12 pathogens (inactive)	HPLC-PDAD-ELSD, H NMR	NMR (1D, 2D), glycosyl composition, glycosyl linkage, glycosyl configuration, mass by UHPLC-QTOFMS with per-O-methylation
CC (CJS)	Coleman 2020	2014	CJS	obtained from Ocean Spray Cranberries						radiolabeled E. coli anti-adhesion, fluorescence-labeled E. coli anti-adhesion, antimicrobial activity against 12 pathogens (inactive)
CCE	Coleman 2014, Coleman 2020	2014	CJS	solvent/solvent extraction. 500 mL syrup diluted with 300 mL water, extracted with 8x 200 mL ethyl acetate	NA: solvent partitioning	EtOAc soluble	NA	not given	can not be calculated	fluorescence-labeled E. coli anti-adhesion
CCA	Coleman 2014, Coleman 2020	2014	CJS	solvent/solvent extraction. 500 mL syrup diluted with 300 mL water, extracted with 8x 200 mL ethyl acetate	NA: solvent partitioning	water soluble	NA	not given	can not be calculated	fluorescence-labeled E. coli anti-adhesion
CCA1-01	Coleman 2014, Coleman 2020	2014	CCA1	Sephadex LH-20 with 70% EtOH (7x37 cm); 50.53 g CCA in 200 mL 70% EtOH	NA: vol/time-based collection; visual appearance-based fraction combinations	early elution from SepLH20	SepLH20	0.0075	can not be calculated	fluorescence-labeled E. coli anti-adhesion	HPLC-PDAD-ELSD, H NMR
CCA1-02	Coleman 2014, Coleman 2020	2014	CCA1	Sephadex LH-20 with 70% EtOH (7x37 cm); 50.53 g CCA in 200 mL 70% EtOH	NA: vol/time-based collection; visual appearance-based fraction combinations	early elution from SepLH20	SepLH20	0.018	can not be calculated	fluorescence-labeled E. coli anti-adhesion	HPLC-PDAD-ELSD, H NMR
CCA1-03	Coleman 2014, Coleman 2020	2014	CCA1	Sephadex LH-20 with 70% EtOH (7x37 cm); 50.53 g CCA in 200 mL 70% EtOH	NA: vol/time-based collection; visual appearance-based fraction combinations	early elution from SepLH20	SepLH20	0.015	can not be calculated	fluorescence-labeled E. coli anti-adhesion	HPLC-PDAD-ELSD, H NMR
CCA2-01	Coleman 2020	2020	CCA2	Sephadex LH-20 with 70% EtOH (10x49 cm); 151.33 g CCA in 500 mL 70% EtOH	NA: vol/time-based collection; visual appearance-based fraction combinations	early elution from SepLH20	SepLH20	0.00021	can not be calculated	fluorescence-labeled E. coli anti-adhesion	HPLC-PDAD-ELSD, H NMR
CCA2-02	Coleman 2020	2020	CCA2	Sephadex LH-20 with 70% EtOH (10x49 cm); 151.33 g CCA in 500 mL 70% EtOH	NA: vol/time-based collection; visual appearance-based fraction combinations	early elution from SepLH20	SepLH20	0.0014	can not be calculated	fluorescence-labeled E. coli anti-adhesion	HPLC-PDAD-ELSD, H NMR
CCA2-03	Coleman 2020	2020	CCA2	Sephadex LH-20 with 70% EtOH (10x49 cm); 151.33 g CCA in 500 mL 70% EtOH	NA: vol/time-based collection; visual appearance-based fraction combinations	early elution from SepLH20	SepLH20	0.011	can not be calculated	fluorescence-labeled E. coli anti-adhesion
CCA2-04	Coleman 2020	2020	CCA2	Sephadex LH-20 with 70% EtOH (10x49 cm); 151.33 g CCA in 500 mL 70% EtOH	NA: vol/time-based collection; visual appearance-based fraction combinations	early elution from SepLH20	SepLH20	0.021	can not be calculated	fluorescence-labeled E. coli anti-adhesion
CCA2-05	Coleman 2020	2020	CCA2	Sephadex LH-20 with 70% EtOH (10x49 cm); 151.33 g CCA in 500 mL 70% EtOH	NA: vol/time-based collection; visual appearance-based fraction combinations	early elution from SepLH20	SepLH20	0.011	can not be calculated	fluorescence-labeled E. coli anti-adhesion
CHEP/A1/Cranf1	Hotchkiss 2015, Hotchkiss 2013	2013	Whole berries - Fresh Juice Spray dried	20g/200 mL; 5 g in 50 mL loaded x4	NA	water soluble	NA	NA	NA	Adhesion Assays: E. coli (CFT073 and UTI89) with T24 uroepithelial cells. E. coli (O157:H7) with HT29 colonic epithelial cells		Neutral sugar content (NS) and uronic acid content (UA) for hydrolyzed and unhydrolyzed monosaccharides. Degree of methyl esterification (DE), degree of acetylation (DA). Monosaccharide analysis	Carb Anal: Pectin fragments and neutral sugars (UA 35.6%, DE 7 %, DA 1.7%, NS 53.8%). Monosacc Anal: 25.4% Glc, 10.7% Ara, 7.4% Gal, 6.6% Xyl, 0.3% Rha, 0.2% Fuc, 49.4% GalA, 0.1% GlcA. HP-SEC: weight avg molec mass of 5510 Da. DPV: low MW and low-viscosity polysaccharides. UV: Contains polyphenols
Cranf1W	Hotchkiss 2015, Hotchkiss 2013	2013	CHEP/A1	SNAP KP-C18-HS, 120g; 100% dH2O, 500 mL, 35 mL/min	NA: vol/solv-based collection	100% dH2O	RP C18	Not given	can not be calculated
A2/Cranf1b	Hotchkiss 2015, Hotchkiss 2013	2013	CHEP/A1	SNAP KP-C18-HS, 120g; 15% MeOH, 500 mL, 35 mL/min	NA: vol/solv-based collection	15% MeOH	RP C18	0.2485	0.249		HPLC-RI	Neutral sugar content (NS) and uronic acid content (UA) for hydrolyzed and unhydrolyzed monosaccharides. Degree of methyl esterification (DE), degree of acetylation (DA). Monosaccharide analysis	Pink-colored powder. Carb Anal: Neutral, sugar-rich, low amounts of uronic acid (UA 5.3%, DE 4.9 %, DA 1.5%, NS 86%). Monosacc Anal: 46% Glc, 28.5% Ara, 4.6% Gal, 17% Xyl, 0.5% Rha, 0.4% Fuc, 3.2% GalA, 0% GlcA. HP-SEC: weight avg molec mass of 3410 Da. DPV: low MW and low-viscosity polysaccharides
Cranf1M	Hotchkiss 2015, Hotchkiss 2013	2013	CHEP/A1	SNAP KP-C18-HS, 120g; 100% MeOH, 500 mL, 35 mL/min	NA: vol/solv-based collection	100% MeOH	RP C18	Not given	can not be calculated		visual pink color		phenolic content
A6	Hotchkiss 2015, Hotchkiss 2013	2013	A2/Cranf1b	Sephadex LH-20 with 100% dH2O, 2.5 mL/min; TSK GMPW-XL column: 0.05 M NaNO3/0.01% NaN3	volume/time	100% dH2O	SepLH20	0.9	0.224	Adhesion Assays: E. coli (CFT073 and UTI89) with T24 uroepithelial cells. E. coli (O157:H7) with HT29 colonic epithelial cells	HP-SEC-MALLS-DPV-RI with TSK GMPWXL column; NMR (1D, 2D), UV (230 & 280 nm)	Neutral sugar content (NS) and uronic acid content (UA) for hydrolyzed and unhydrolyzed monosaccharides. Degree of methyl esterification (DE), degree of acetylation (DA). Monosaccharide analysis	Slightly pink, off-white powder. Carb Anal: Neutral sugar rich (UA 13%, DE 7.5 %, DA 1.7%, NS 81.3%). Monosacc Anal: 50.3% Glc, 25.7% Ara, 4.4% Gal, 14.8% Xyl, 0.5% Rha, 0.4% Fuc, 3.7% GalA, 0.2% GlcA. HP-SEC: weight avg molec mass of 2750 Da. DA: acetylation present. DPV: low MW and low-viscosity polysaccharides. No absorption at 230 and 280 nm. NMR: consistent with arabinoxyloglucans. Sequentia…
Other A2 Fract	Hotchkiss 2015, Hotchkiss 2013	2013	A2/Cranf1b	Sephadex LH-20 with 75% Acetone, 2.5 mL/min	volume/time	75% Acetone	SepLH20	Not given	can not be calculated		visual pink color	NA	phenolic content
A6 (after PGC)	Hotchkiss 2015, Hotchkiss 2013	2013	A6	CarboPrep 90 Graphatized Carbon Cartridge 3 mL; 250 mg (condit with 50% MeCN and D2O, load 3-5 mg sample/ 1 mL dH2O, wash with water) Eluted with 30% MeCN + 0.1% TFA	NA: vol/solv-based collection	30% MeCN with 0.1% TFA	PGC	Not given	can not be calculated		MALDI-TOF/TOF MS/MS with CID (DHBA)		Series of ions corresponding to xyloglucan structures. No ions corresponding to PACs.
Cranf1/CHEP	Sun 2015	2015	Whole berries - Fresh Juice Spray dried	column load: 50 mL (100 mg/mL) = 5 g	NA	water soluble	NA	NA	NA	Biofilm Formation Assay: E. coli (MG1655 & CFT073)	NA	TPC = 5173+/-12
Cranf1W	Sun 2015	2015	Cranf1/ CHEP as per Hotchkiss 2015	SNAP KP-C18-HS, 120g; 100% dH2O, 500 mL	NA: vol/solv-based collection	100% dH2O	RP C18	0.381	0.381	Biofilm Formation Assay: E. coli (MG1655 & CFT073)	NA	TPC = 180+/-4	lower TPC than parent material
Cranf1b	Sun 2015	2015	Cranf1/ CHEP as per Hotchkiss 2015	SNAP KP-C18-HS, 120g; 15% MeOH, 500 mL	NA: vol/solv-based collection	15% MeOH	RP C18	0.238	0.238	Biofilm Formation Assay: E. coli (MG1655 & CFT073), Quiescence Assay with E. coli CFT073 (Sun 2019)	NA	TPC = 3833 +/- 88	lower TPC than parent material
Cranf1M	Sun 2015	2015	Cranf1/ CHEP as per Hotchkiss 2015	SNAP KP-C18-HS, 120g; 100% MeOH, 500 mL	NA: vol/solv-based collection	100% MeOH	RP C18	0.281	0.281	Biofilm Formation Assay: E. coli (MG1655 & CFT073)	NA	TPC = 15706 +/- 457	3x higher in polyphenol constituents
Cranf1bF1	Sun 2015	2015	Cranf1b	Sepharose Q XL 16/10 with 0-1 M NaCl stepwise gradient, 5mL/min, 10 mL fractions	total carb content assay	100% dH2O	AnEx	0.64	0.152	NA	NA	Phenol sulfuric acid assay (Masuko 2005)	Carb Content detected
Cranf1bF2	Sun 2015	2015	Cranf1b	Sepharose Q XL 16/10 with 0-1 M NaCl stepwise gradient, 5mL/min, 10 mL fractions; Bio-gel P2 with water for desalting;	total carb content assay	0.1 M NaCl	AnEx/ Desalting	0.175	0.0417	NA	NA	Phenol sulfuric acid assay (Masuko 2005)	Carb Content detected
Cranf1b-F3	Sun 2015	2015	Cranf1b	Sepharose Q XL 16/10 with 0-1 M NaCl stepwise gradient, 5mL/min, 10 mL fractions; Bio-gel P2 with water for desalting	total carb content assay	Not given	AnEx/ Desalting	0.025	0.006	NA	NA	Phenol sulfuric acid assay (Masuko 2005)	Carb Content detected
Cranf1b-F4	Sun 2015	2015	Cranf1b	Sepharose Q XL 16/10 with 0-1 M NaCl stepwise gradient, 5mL/min, 10 mL fractions; Bio-gel P2 with water for desalting	total carb content assay	Not given	AnEx/ Desalting	<1.0%	0.0024	NA	NA	Phenol sulfuric acid assay (Masuko 2005)	Carb Content detected
Cranf1b-F1	Sun 2015	2015	Cranf1bF1	Sephacryl S-100 HR 16/60 with water at 0.25 mL/min		100% dH2O	Gel Filtr	0.909	0.1385	Biofilm Formation Assay: E. coli (MG1655 & CFT073)	MA	NA	NA
Cranf1b-F2	Sun 2015	2015	Cranf1bF2	Sephacryl S-100 HR 16/60 with water at 0.25 mL/min; TSK gel G3000PW with dH2O	Refractive Index/ Standard Curve	100% dH2O	Gel Filtr	0.917	0.0382	Biofilm Formation Assay: E. coli (MG1655 & CFT073)	NMR (H, C, 2D: 1 mg/mL); MALDI-TOF-MS (DHBA)	HP-SEC for MW; Glycosyl Composition; Glycosyl Linkage	HP-SEC: Ag Mass 1370 Da (formation of aggregates); MALDI-TOF MS: mixture of oligomers within a close MW range (m/z 1055-1700+); Monosac: 46% Ara, 40% Glc, 12% Xyl, 2% Gal; Linkage: Common XG linkages, 5-α-Ara, 3-α-Ara, 3,5-α-Ara
Cranf1/CHEP	Sun 2016	2016	Whole berries - Fresh Juice Spray dried	column load: 20 mL (100 mg/mL) = 2 g	NA	water soluble	NA	NA	NA	see other studies	NA	NA	NA
Cranf1W	Sun 2016	2016	Cranf1/ CHEP	RediSep GOLD C18; 100% dH2O, 500 mL	NA: vol/solv-based collection	100% dH2O	RP C18	0.381	0.381	NA	NA	NA	NA
Cranf1b	Sun 2016	2016	Cranf1/ CHEP	RediSep GOLD C18; 15% MeOH, 500 mL	NA: vol/solv-based collection	15% MeOH	RP C18	0.238	0.238	NA	NA	NA	NA
Cranf1M	Sun 2016	2016	Cranf1/ CHEP	RediSep GOLD C18; 100% MeOH, 500 mL	NA: vol/solv-based collection	100% MeOH	RP C18	0.281	0.281	NA	NA	NA	NA
Cranf1bA	Sun 2016	2016	Cranf1b	Hypersep Hypercarbon SPE 1 g: condit with 50% MeCN, washed with dH2O, 10 mg sample /2 mL dH2O loaded	NA: vol/solv-based collection	30% MeCN + 0.1% TFA	PGC	Not given	Not given	Quiescence Assay with E. coli CFT073 (inactive) (reported in Sun 2019)	H NMR	None	Primarily neutral oligosaccharides with small amounts of monosaccharides, salts, and trace amounts of proteins, lipids and pigments
Cranf1b-CL	Sun 2016	2016	Cranf1bA	C18 RP SPE (50 mg) with dH2O	NA: vol/solv-based collection	dH2O	RP C18	Not given	0.179	DPPH free radical scavenging Assay; Advanced Glycation End-Products Assay; Methylglyoxal Trapping Assay (inactive)	H NMR; MALDI-TOF-MS (DHBA)	Glycosyl Composition (hydrolyzed and unhydrolyzed samples)	carbohydrate only, oligosaccharide-enriched/phenolic free; 47% Glc, 23% Xyl, 25% Ara, 5% Gal; Unhydrolyzed fraction with trace 0.7% Glc and no other monosaccharides detected
CJS	Neto 2017	2017	Whole berries - Fresh Juice, Reverse Osmosis Conc	50 Brix, from Ocean Spray Inc.	NA	water soluble	NA	NA	NA
NDM	Neto 2017	2017	CJS	dH2O 10x the volume of CJS, changed 6x for 6 days; MW cut-off of 12,000-14,000 Da	physical separation	retained in dialysis membrane	NA	6g/1 L CJS	6 g	Biofilm formation with S. mutans (UA159), S. aureus (MRSA), S. epidermidis (RP62A). Baterial coaggregation of Fusobacterium nucleatum with either Streptococcus sanguinis or Porphyromonas gingivalis. Oxidant-scavenging ability with luminol-dependent chemiluminescence assay	HPLC-PDAD (210-600 nm), NMR, MALDI-TOF MS	Total phenolic content by Folin Ch	32±2% Phenols; Also retained when dialyzed in 50% EtOH using same MW cut off membrane type - indicates aggregation or interactions between carbohydrate and flavonoid components preventing dialysis (PAC dimers will pass through the membrane when in pure solution). Clear solution in water or 50% EtOH at 0.5 mg/mL
DZM	Neto 2017	2017	CJS	dH2O 10x the volume of CJS, changed 6x for 6 days; MW cut-off of 12,000-14,000 Da	physical separation	passed through dialysis membrane	NA	not given	Not given	NA	NA	NA	NA
NDMEt	Neto 2017	2017	NDM	Sephadex LH-20; 50% EtOH, 2 mL/min, 3x void vol	NA: vol/solv-based collection	50% EtOH	SepLH20	0.737	4.42 g	Baterial coaggregation of Fusobacterium nucleatum with either Streptococcus sanguinis or Porphyromonas gingivalis. Oxidant-scavenging ability with luminol-dependent chemiluminescence assay	HPLC-PDAD (210-600 nm), NMR, MALDI-TOF MS (DHBA)	Total phenolic content by Folin Ch	14±5% Phenols; no antioxidant activity with assay used. HPLC-PDAD: diminished polyphenol absorbances (280 nm) relative to NDMac material. H NMR mainly 3.5-5.5 ppm, minimal signal > 6 ppm. MALDI-TOF-MS: oligosaccharides (xyloglucans), minor polyphenolic oligomer content
NDMAc	Neto 2017	2017	NDM	Sephadex LH-20; 75% Acetone, 2 mL/min, 3x void vol	NA: vol/solv-based collection	75% Acetone	SepLH20	0.221	1.33 g	Biofilm formation with S. mutans (UA159), S. aureus (MRSA), S. epidermidis (RP62A). Baterial coaggregation of Fusobacterium nucleatum with either Streptococcus sanguinis or Porphyromonas gingivalis. Oxidant-scavenging ability with luminol-dependent chemiluminescence assay	HPLC-PDAD (210-600 nm), NMR, MALDI-TOF MS (DHBA)	Total phenolic content by Folin Ch	63±11% Phenols, Antioxidant activity with assay used. HPLC-PDAD: Increased intensity of polyphenol absorbances (280 nm) relative to NDM material. H NMR: broad signals 5.7-6.1 and 6.5-7.2 ppm consistent with PACs and flavonols. 8.5-9.0 ppm characteristic of anthocyanin and PAC phenolic protons. MALDI-TOF-MS: fragmentation patterns consistent with PAC oligomers (DP3-7), anthocyanin glycosidesm, que…
NDMAc-MDI-1	Neto 2017	2017	NDMAc	MCI Gel CHP20P, precondit with M/W, stepwise elution with increasing MeOH concentrations	NA: vol/solv-based collection	30% MeOH	MCI Gel	0.086	0.114 g	Biofilm formation with S. mutans (UA159), S. aureus (MRSA), S. epidermidis (RP62A). Baterial coaggregation of Fusobacterium nucleatum with either Streptococcus sanguinis or Porphyromonas gingivalis.	NA	NA	NA
NDMAc-MDI-2	Neto 2017	2017	NDMAc	MCI Gel CHP20P, precondit with M/W, stepwise elution with increasing MeOH concentrations	NA: vol/solv-based collection	50% MeOh	MCI Gel	0.458	0.609 g	Biofilm formation with S. mutans (UA159), S. aureus (MRSA), S. epidermidis (RP62A). Baterial coaggregation of Fusobacterium nucleatum with either Streptococcus sanguinis or Porphyromonas gingivalis.	MALDI-TOF-MS (DHBA)	NA	MALDI-TOF-MS: anthocyanin glycosides, PACs (DP 4-7), no oligosaccharides. Less active in biofilm and aggregation assays
NDMAc-MDI-3	Neto 2017	2017	NDMAc	MCI Gel CHP20P, precondit with M/W, stepwise elution with increasing MeOH concentrations	NA: vol/solv-based collection	70% MeOH	MCI Gel	0.298	0.396 g	Biofilm formation with S. mutans (UA159), S. aureus (MRSA), S. epidermidis (RP62A). Baterial coaggregation of Fusobacterium nucleatum with either Streptococcus sanguinis or Porphyromonas gingivalis.	MALDI-TOF-MS (DHBA)	NA	MALDI-TOF-MS: oligosaccharides and anthocyanin glycosides. Highest activity in both biofilm and coaggregation assays
NDMAc-MDI-4	Neto 2017	2017	NDMAc	MCI Gel CHP20P, precondit with M/W, stepwise elution with increasing MeOH concentrations	NA: vol/solv-based collection	100% MeOH	MCI Gel	0.015	0.02 g	Biofilm formation with S. mutans (UA159), S. aureus (MRSA), S. epidermidis (RP62A). Baterial coaggregation of Fusobacterium nucleatum with either Streptococcus sanguinis or Porphyromonas gingivalis.	NA	NA	NA
Cranf1/CHEP	Ozcan 2017 (ref to Sun 2015)	2017	Whole berries - Fresh Juice Spray dried	same as Sun 2016 but with column load: 20 mL (100 mg/mL) = 2 g	NA	water soluble	NA	NA	NA	see other studies	NA	NA	NA
Cranf1b-XG	Ozcan 2017	2017	Cranf1b (from Sun 2016)	Sephacryl S-100 HR 16/60 with dH2O at 0.5 mL/min: 100 mg/ 2mL	total carb content assay (Masuko 2005)	100% dH2O	Gel Filtr	0.595	0.1416	fermentation by Bifidobacterium and Lactobacillus species and strains.	H NMR; MALDI-TOF MS (DHBA)	Phenol sulfuric acid assay (Masuko 2005)	total carb content detected.
Cranf1bW	Sun 2019	2019	Cranf1b (from Sun 2015)	Hypersep Hypercarbon SPE 1 g: condit with 50% MeCN, washed with dH2O, 40 mg sample /2mL dH2O loaded	NA: vol/solv-based collection	dH2O	PGC	Not given	can not be calculated	Quiescence Assay with E. coli CFT073 (inactive)	NA	NA	NA
Cranf1b-cPOS	Sun 2019	2019	Cranf1b (from Sun 2015)	Hypersep Hypercarbon SPE 1 g: condit with 50% MeCN, washed with dH2O, 40 mg sample /2mL dH2O loaded	NA: vol/solv-based collection	10% MeCN + 0.1% TFA	PGC	0.15	0.06	Quiescence Assay with E. coli CFT073, Persistence Assay with E. coli CFT073	LC-ESI-MS/MS, UV 235 nm, HR-ESI-MS, NMR (1D, 2D)	uronic acid ID with GlcA and GalA standards, Glycosyl composition	Pectic Oligosaccharides: Unsaturated poly-galacturonic methyl esters. NMR: poly-uronic acids. Monosaccharide analysis: GalA only. Trace amounts of saturated poly-galacturonic acid methyl esters. MS and MS/MS fragmentation patterns consistent with 1-2 free carboxylic acids, unsaturation, and poly-galacturonic acid methyl esters with DP 3-8
Cranf1bA	Sun 2019	2019	Cranf1bS	Hypersep Hypercarbon SPE 1 g: separation conditions assumed to be the same as those used for Cranf1b-cPOS: condit with 50% MeCN, washed with dH2O, sample load info not provided	NA: vol/solv-based collection	30% MeCN + 0.1% TFA	PGC	not given	can not be calculated	Quiescence Assay with E. coli CFT073 (Inactive)	See [Sun 2016]	NA	See [Sun 2016]: neutral oligosaccharides
Cranf1bT	Sun 2019	2019	Cranf1b (from Sun 2015)	95% EtOH: 200 mg sample in 30 mL solvent	NA: solid/liquid separation	soluble in 95% EtOH	NA	not given	can not be calculated	Quiescence Assay with E. coli CFT073 (inactive)	LC-MS/MS, UV 235 nm	NA	6,7-dihydromonotropein, deacetylasperulsidic acid, monotropein, Isolated from cPOS material by Amide HILIC LC-UV
Cranf1bS	Sun 2019	2019	Cranf1b (from Sun 2015)	95% EtOH: 200 mg sample in 30 mL solvent	NA: solid/liquid separation	precipate in 95% EtOH	NA	not given	can not be calculated	NA	NA	NA	NA
Cranf1bSW	Sun 2019	2019	Cranf1bS	Hypersep Hypercarbon SPE 1 g: separation conditions assumed to be the same as those used for Cranf1b-cPOS: condit with 50% MeCN, washed with dH2O, sample load info not provided	NA: vol/solv-based collection	dH2O	PGC	not given	can not be calculated	NA	NA	NA	NA
Cranf1bS-cPOSt	Sun 2019	2019	Cranf1bS	Hypersep Hypercarbon SPE 1 g: separation conditions assumed to be the same as those used for Cranf1b-cPOS: condit with 50% MeCN, washed with dH2O, sample load info not provided	NA: vol/solv-based collection	10% MeCN + 0.1% TFA	PGC	0.917	can not be calculated	Persistence Assay with E. coli CFT073	LC-MS/MS, UV 235 nm,	determined for parent material cPOS	similar to cPOS but without Cranf1bT iridoid glucosides
Cranf1bSA	Sun 2019	2019	Cranf1bS	Hypersep Hypercarbon SPE 1 g: separation conditions assumed to be the same as those used for Cranf1b-cPOS: condit with 50% MeCN, washed with dH2O, sample load info not provided	NA: vol/solv-based collection	30% MeCN + 0.1% TFA	PGC	not given	can not be calculated	NA	NA	NA	NA
uG3m2	Sun 2019	2019	Cranf1b-cPOS	TSK gel Amide-80 HR HILIC; linear gradient 80% MeCN with 0.1% TFA to 40% MeCN with 0.1% TFA over 30 min	ESI-MS	10 min; ~67% MeCN with 0.1% TFA	Amide HILIC	not given	can not be calculated	Quiescence Assay with E. coli CFT073	LC-ESI-MS/MS, HR-ESI-MS/MS, UV 235 nm	determined for parent material cPOS	HRMS (m/z): [M−H]−, C20H27O18, 555.1205, calcd. 555.1197
uG4m3	Sun 2019	2019	Cranf1b-cPOS	TSK gel Amide-80 HR HILIC; linear gradient 80% MeCN to 40% MeCN with 0.1% TFA	ESI-MS	12.5 min; ~63% MeCN with 0.1% TFA	Amide HILIC	not given	can not be calculated	Quiescence Assay with E. coli CFT073	LC-ESI-MS/MS, HR-ESI-TOF-MS/MS, UV 235 nm, NMR (1D, 2D)	determined for parent material cPOS	full structure elucidation reported; HRMS (m/z): [M−H]−, C27H37O24, 745.1692, calcd.745.1674
HDP-cPOS	Sun 2019	2019	Cranf1b-cPOS	TSK gel Amide-80 HR HILIC; linear gradient 80% MeCN to 40% MeCN with 0.1% TFA	ESI-MS	13-24 min; ~63-48% MeCN with 0.1% TFA	Amide HILIC	not given	can not be calculated	Quiescence Assay with E. coli CFT073	LC-ESI-MS/MS, HR-ESI-MS/MS, UV 235 nm	determined for parent material cPOS	higher DP polygalacturonic acid methyl esters
Reference # in main text
25	Coleman 2014
26	Coleman 2019
27	Auker 2013
28	Auker 2019
29	Coleman 2020
72	Hotchkiss 2013
112	Hotchkiss 2015
113	Neto 2017
114	Sun 2015
115	Sun 2016
131	Ozcan 2017
133	Sun 2019
138	Masuko 2005

## Sheet: Abbreviations
ADME	absorption, distribution, metabolism, excretion
AnEx	anion exchange chromatography
CFU	colony forming units
CHEP	cranberry hull extract powder ("juice powder")
CID	collision-induced dissociation
CJ	cranberry juice (fresh pressed or from CJS, no additives)
CJB	cranberry juice blend (with added fruit juices)
CJK	cranberry juice cocktail (with added sugar)
CJS	concentrated juice syrup/ cranberry juice syrup
CP	cranberry pomace (fresh pressed)
CS	cranberry sauce (whole: WCS/ jellied: JCS)
DCP	dried cranberry pomace
DHBA	2,3-dihydroxybenzoic acid (matrix soln for MALDI-TOF MS)
DP	degrees of polymerization
DPPH	2,2-diphenyl-1-picrylhydrazyl
DPV	differential pressure viscometer
ELSD	evaporative light scattering detection
ESI-MS	electrospray ionization mass spectrometry
EtOH	ethanol
FWB	fresh whole cranberries
HILIC	hydrophilic-lipophilic interaction chromatography
HPLC	high performance liquid chromatography
HP-SEC	high performance size exclusion chromatography
HRBC	human red blood cell
IC50	concentration with 50% inhibition
LC	liquid chromatography
MALDI-TOF MS	matrix-assisted laser desorption ionization time-of-flight mass spectrometry
MALLS	multiangle laser light scattering photometer
MeCN	acetonitrile
MeOH	methanol
MIC	minimum inhibitory concentration
MS	mass spectrometry
MW	molecular weight
NMR	nuclear magnetic resonance (spectroscopy)
PAC	proanthocyanidins
PBS	phosphate buffered saline
PDAD	photodiode array detection (UV)
PGC	porous graphitized carbon
RI	refractive index (differential refractive index interferometer)
RP C18	Reversed Phase; C18 sorbent
SCFA	short chain fatty acids
SDC	sweetened dried cranberries
SepLH20	sephadex LH-20: lipophilic/hydrophobic gel filtration with cross-linked dextrans
SPE	solid phase extraction
TCC	Total Carbohydrate Content Method (Masuko 2005)
TFA	trifluoroacetic acid
TPC	total phenolic content (mg/100g gallic acid equivalents) Folin-Ciocalteau method
UT	urinary tract
UTI	urinary tract infection
UV	ultraviolet (detection)
WBP	whole cranberry powder
NDM	non-dialyzable material (from cranberry)
